# Supplementary material
Source: PubMed Central journal article supplement (PMC4533023)
Supplement: Supp_Fig1.pdf [file Supp_Fig1.pdf]

## Supplementary Data

**A**

| Donor | PCR score | histology score | GAG score | overall score |
|-------|-----------|-----------------|-----------|---------------|
| D.055 | 3         | 3               | 2         | 3             |
| D.056 | 3         | 3               | 2         | 3             |
| D.057 | 2         | 3               | 2         | 2             |
| D.058 | 3         | 3               | 2         | 3             |
| D.059 | 3         | 2               | 2         | 2             |
| D.060 | 3         | 3               | 2         | 3             |
| D.064 | 1         | 1               | 1         | 1             |
| D.065 | 3         | 2               | 2         | 2             |
| D.067 | 2         | 2               | 2         | 2             |
| D.071 | 3         | 2               | 3         | 3             |
| D.074 | 3         | 3               | 2         | 3             |
| D.075 | 3         | 3               | 2         | 3             |
| D.027 | 3         | 3               | 2         | 3             |
| D.038 | 2         | 2               | 2         | 2             |
| D.040 | 1         | 1               | 2         | 1             |
| D.043 | 3         | 2               | 2         | 2             |
| D.047 | 1         | 1               | 1         | 1             |
| D.049 | 3         | 2               | 2         | 2             |
| D.051 | 3         | 2               | 2         | 2             |
| D.078 | 3         | 3               | 2         | 3             |

**B**

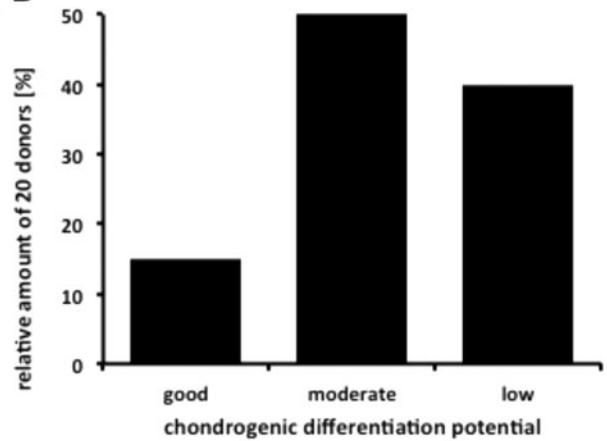

**C**

| chondrogenic potential | donors | relative amount of 20 donors |
|------------------------|--------|------------------------------|
| good                   | 3      | 0.15                         |
| moderate               | 9      | 0.45                         |
| low                    | 8      | 0.4                          |

**SUPPLEMENTARY FIG. S1.** Scoring of 20 donors according to their chondrogenic potential. **(A)** Scoring was done using mRNA expression levels of chondrogenic marker genes (positive judgment for high expression of *ACAN*, *COL2A1*, *FRZB*, and *SOX9*; low expression of *COL10A1*, *COL1A1*); histological scoring was done by three independent individuals based on the amount of positive Alcian Blue stain as well as histological appearance of the cartilage matrix; for glycosaminoglycan (GAG), scoring donors were separated into high levels, moderate levels, and no level of GAG expression. **(B)** Based on the overall score, the percentage of donors in each group was plotted, data for **(B)** were based on the table in **(C)**.
