# Supplementary material
Source: PubMed Central journal article supplement (PMC4533023)
Supplement: Supp_Table1.pdf [file Supp_Table1.pdf]

SUPPLEMENTARY TABLE S1. mRNA MICROARRAY RESULTS

| <i>Symbol</i>       | <i>Entrez gene name</i>                                                                              | <i>Log ratio</i> | <i>P-value</i> |
|---------------------|------------------------------------------------------------------------------------------------------|------------------|----------------|
| <i>CHI3L1</i>       | Chitinase 3-like 1 (cartilage glycoprotein-39)                                                       | 1.654            | 4.81E-02       |
| <i>RPS4Y1</i>       | Ribosomal protein S4, Y-linked 1                                                                     | 1.390            | 2.16E-01       |
| <i>TRIB1</i>        | Tribbles homolog 1 ( <i>Drosophila</i> )                                                             | 1.024            | 4.31E-02       |
| <i>GAS1</i>         | Growth arrest-specific1                                                                              | 0.941            | 2.21E-02       |
| <i>SRSF6</i>        | Serine/arginine-rich splicing factor 6                                                               | 0.935            | 3.54E-03       |
| <i>COLEC12</i>      | Collectin subfamily member 12                                                                        | 0.925            | 1.35E-01       |
| <i>HES1</i>         | Hairy and enhancer of split 1 ( <i>Drosophila</i> )                                                  | 0.915            | 3.55E-02       |
| <i>PTGS2</i>        | Prostaglandin-endoperoxide synthase 2 (prostaglandin G/H synthase and cyclooxygenase)                | 0.879            | 7.52E-02       |
| <i>LRRC15</i>       | Leucine-rich repeat containing 15                                                                    | 0.850            | 1.58E-01       |
| <i>CTSK</i>         | Cathepsin K                                                                                          | 0.835            | 5.46E-02       |
| <i>NR4A2</i>        | Nuclear receptor subfamily 4, group A, member 2                                                      | 0.834            | 1.16E-01       |
| <i>ENPP1</i>        | Ectonucleotide pyrophosphatase/phosphodiesterase 1                                                   | 0.793            | 4.88E-02       |
| <i>CH25H</i>        | Cholesterol 25-hydroxylase                                                                           | 0.785            | 8.53E-02       |
| <i>BAALC</i>        | Brain and acute leukemia, cytoplasmic                                                                | 0.782            | 3.07E-02       |
| <i>FOS</i>          | FBJ murine osteosarcoma viral oncogene homolog                                                       | 0.763            | 2.17E-01       |
| <i>IGFBP5</i>       | Insulin-like growth factor binding protein 5                                                         | 0.705            | 3.56E-03       |
| <i>HAS1</i>         | Hyaluronan synthase 1                                                                                | 0.703            | 1.01E-01       |
| <i>TNC</i>          | Tenascin C                                                                                           | 0.696            | 3.37E-02       |
| <i>SRPX</i>         | Sushi-repeat containing protein, X-linked                                                            | 0.660            | 8.02E-03       |
| <i>CTBP1</i>        | C-terminal binding protein 1                                                                         | 0.649            | 1.07E-01       |
| <i>EIF1AY</i>       | Eukaryotic translation initiation factor 1A, Y-linked                                                | 0.647            | 2.06E-01       |
| <i>BHLHE40</i>      | Basic helix-loop-helix family, member e40                                                            | 0.637            | 8.87E-02       |
| <i>RAB3B</i>        | RAB3B, member RAS oncogene family                                                                    | 0.612            | 2.46E-02       |
| <i>GSTT2/GSTT2B</i> | Glutathione S-transferase theta-2                                                                    | 0.607            | 1.52E-03       |
| <i>ETV1</i>         | Ets variant 1                                                                                        | 0.584            | 2.30E-02       |
| <i>FBN2</i>         | Fibrillin-2                                                                                          | 0.583            | 2.25E-01       |
| <i>MATN2</i>        | Matrilin-2                                                                                           | 0.580            | 7.64E-03       |
| <i>MAFB</i>         | v-maf musculoaponeurotic fibrosarcoma oncogene homolog B (avian)                                     | 0.566            | 5.12E-02       |
| <i>DDX3Y</i>        | DEAD (Asp-Glu-Ala-Asp) box polypeptide 3, Y-linked                                                   | 0.558            | 2.96E-01       |
| <i>FOSB</i>         | FBJ murine osteosarcoma viral oncogene homolog B                                                     | 0.550            | 2.10E-01       |
| <i>OLFML3</i>       | Olfactomedin-like 3                                                                                  | 0.548            | 9.79E-02       |
| <i>ATF3</i>         | Activating transcription factor 3                                                                    | 0.544            | 1.43E-01       |
| <i>INSIG1</i>       | Insulin-induced gene 1                                                                               | 0.536            | 1.82E-01       |
| <i>PTN</i>          | Pleiotrophin                                                                                         | 0.532            | 5.33E-03       |
| <i>NUCKS1</i>       | Nuclear casein kinase and cyclin-dependent kinase substrate 1                                        | 0.527            | 2.96E-02       |
| <i>APOBEC3B</i>     | Apolipoprotein B mRNA editing enzyme, catalytic polypeptide-like 3B                                  | 0.524            | 3.67E-03       |
| <i>ACAT2</i>        | Acetyl-CoA acetyltransferase 2                                                                       | 0.524            | 3.96E-02       |
| <i>EIF2S3</i>       | Eukaryotic translation initiation factor 2, subunit 3 gamma, 52 kDa                                  | 0.513            | 8.23E-02       |
| <i>PTX3</i>         | Pentraxin 3, long                                                                                    | -0.500           | 4.03E-01       |
| <i>CNN1</i>         | Calponin 1, basic, smooth muscle                                                                     | -0.504           | 1.78E-02       |
| <i>ITGBL1</i>       | Integrin, beta-like 1 (with EGF-like repeat domains)                                                 | -0.516           | 7.01E-02       |
| <i>TXNIP</i>        | Thioredoxin-interacting protein                                                                      | -0.517           | 8.55E-02       |
| <i>CYTL1</i>        | Cytokine-like 1                                                                                      | -0.517           | 4.11E-01       |
| <i>MCAM</i>         | Melanoma cell adhesion molecule                                                                      | -0.519           | 9.54E-02       |
| <i>TIMP3</i>        | TIMP metalloproteinase inhibitor 3                                                                   | -0.520           | 4.11E-02       |
| <i>IFI27</i>        | Interferon, alpha-inducible protein 27                                                               | -0.521           | 1.71E-01       |
| <i>FST</i>          | Follistatin                                                                                          | -0.530           | 2.23E-01       |
| <i>MFAP5</i>        | Microfibrillar-associated protein 5                                                                  | -0.532           | 1.21E-01       |
| <i>FHL1</i>         | Four and a half LIM domains 1                                                                        | -0.535           | 6.07E-02       |
| <i>JAG1</i>         | Jagged 1                                                                                             | -0.549           | 2.32E-01       |
| <i>ACAN</i>         | Aggrecan                                                                                             | -0.565           | 8.00E-02       |
| <i>KRT18</i>        | Keratin 18                                                                                           | -0.565           | 4.25E-01       |
| <i>LTBP1</i>        | Latent transforming growth factor beta-binding protein 1                                             | -0.567           | 1.19E-02       |
| <i>EPAS1</i>        | Endothelial PAS domain protein 1                                                                     | -0.571           | 4.00E-02       |
| <i>SLC7A11</i>      | Solute carrier family 7 (anionic amino acid transporter light chain, xc- system), member 11          | -0.573           | 6.99E-02       |
| <i>DDIT4</i>        | DNA-damage-inducible transcript 4                                                                    | -0.592           | 1.80E-01       |
| <i>ASNS</i>         | Asparagine synthetase (glutamine-hydrolyzing)                                                        | -0.600           | 1.83E-01       |
| <i>LIMCH1</i>       | LIM and calponin homology domains 1                                                                  | -0.600           | 1.12E-01       |
| <i>EFEMP1</i>       | EGF containing fibulin-like extracellular matrix protein 1                                           | -0.602           | 3.69E-02       |
| <i>MTHFD2</i>       | methylenetetrahydrofolate dehydrogenase (NADP+ dependent) 2, methenyltetrahydrofolate cyclohydrolase | -0.607           | 4.80E-02       |

(continued)

SUPPLEMENTARY TABLE S1. (CONTINUED)

| <i>Symbol</i>    | <i>Entrez gene name</i>                                                          | <i>Log ratio</i> | <i>P-value</i> |
|------------------|----------------------------------------------------------------------------------|------------------|----------------|
| <i>C10orf116</i> | Chromosome 10 open reading frame 116                                             | -0.617           | 3.85E-02       |
| <i>CLIC3</i>     | Chloride intracellular channel 3                                                 | -0.636           | 5.97E-03       |
| <i>PSAT1</i>     | Phosphoserine aminotransferase 1                                                 | -0.640           | 8.73E-02       |
| <i>COL4A2</i>    | Collagen, type IV, alpha 2                                                       | -0.655           | 2.86E-03       |
| <i>DEPTOR</i>    | DEP domain containing MTOR-interacting protein                                   | -0.670           | 1.54E-01       |
| <i>SLC7A5</i>    | Solute carrier family 7 (amino acid transporter light chain, L system), member 5 | -0.686           | 4.01E-02       |
| <i>COL1A1</i>    | Collagen type I, alpha 1                                                         | -0.700           | 9.37E-02       |
| <i>ALDH1A3</i>   | Aldehyde dehydrogenase 1 family, member A3                                       | -0.748           | 9.99E-02       |
| <i>COL4A1</i>    | Collagen type IV, alpha 1                                                        | -0.749           | 2.43E-03       |
| <i>KRT14</i>     | Keratin 14                                                                       | -0.776           | 6.33E-03       |
| <i>PPP1R3C</i>   | Protein phosphatase 1, regulatory subunit 3C                                     | -0.783           | 7.34E-03       |
| <i>DKK1</i>      | Dickkopf 1 homolog ( <i>Xenopus laevis</i> )                                     | -0.790           | 1.10E-01       |
| <i>TNFRSF11B</i> | Tumor necrosis factor receptor superfamily, member 11b                           | -0.817           | 2.11E-02       |
| <i>XIST</i>      | X (inactive)-specific transcript (nonprotein coding)                             | -0.892           | 2.03E-01       |
| <i>PTGIS</i>     | Prostaglandin I2 (prostacyclin) synthase                                         | -0.900           | 2.41E-02       |
| <i>ELN</i>       | Elastin                                                                          | -0.923           | 3.67E-02       |
| <i>RGS4</i>      | Regulator of G-protein signaling 4                                               | -0.949           | 2.08E-01       |
| <i>SULF1</i>     | Sulfatase 1                                                                      | -0.994           | 7.93E-03       |
| <i>STC2</i>      | Stanniocalcin-2                                                                  | -0.999           | 2.03E-02       |

Regulated genes with log ratio of difference between good and low-performing donors of at least 0.5. According significance levels for each gene are displayed, but genes were not selected on significance.
